# Supplementary material for: Novel Therapeutic Strategies Exploiting the Unique Properties of Neuroendocrine Neoplasms
Source: MDPI journal article supplement (doi:10.3390/cancers15204960), 2023-10-12
Supplement: s1 [file s1]

## **Supplementary Figure and Table Legends**

**Supplementary Table S1. Neuroendocrine cell lines subjected to library screen.** Characteristics of the three neuroendocrine cells used in the initial library screening.

**Supplementary Table S2.** GSEA (Gene Set Enrichment Analysis) results for the contrast NET vs. other.

The 50 Hallmark gene sets from the MSigDB (Molecular Signature Database) human collection

(<https://www.gsea-msigdb.org/gsea/msigdb/human/genesets.jsp?collection=H>) were used for the enrichment analysis. For details, please see Ref. 1.

**Supplementary Figure S1. Ratification of HDAC inhibitors activity on neuroendocrine cancer cells.** The sensitivity to the HDAC inhibitors, romidepsin, belinostat, pracinostat, givinostat, quisinostat, panobinostat and dacinostat, is ratified using a panel of 13 neuroendocrine cell lines. Activity is plotted as percent of control. Concentrations are Log [M].

**Supplementary Figure S2. Differentially expressed NET genes based on Ingenuity Pathway Analysis. A)** Supervised analysis of cell lines based on the expression of genes with a Log2 fold change absolute value  $>2$  ( $\text{Var}>0.1$ ,  $p<0.05$ ) identified 557 differentially expressed genes between the insensitive and sensitive group among 4,293 genes annotated as of neuroendocrine origin. **B).** Differentially expressed medulla genes. Supervised analysis of cell lines based on the expression of genes with a Log2 fold change absolute value  $>1.5$  ( $\text{Var}>0.1$ ,  $p<0.05$ ) identified 12 differentially expressed genes between the insensitive and sensitive group, utilizing a 30 gene set identified as encoding proteins expressed in the human adrenal medulla by The Human Protein Atlas.

**Supplementary Figure S3. SLC52A3 and YAP1 RNA levels in neuroendocrine cancer cells.**

SLC52A3 and YAP1 RNA levels are expressed as Log2Fold. Kelly, NH6 and NCI-H82 cells show lower RNA levels when compared to GCIY, OE-19, SNU-119, NCI-H2342 and UOK-269 cells.

**Supplementary Figure S4. Riboflavin deficiency plays a role in Kelly and NH6 sensitivity to NAMPT inhibitors. A) SLC52A3 protein expression analysis in sensitive and resistant cells.**

**B) Riboflavin addition protects Kelly and NH6 from NAMPTs inhibitor cytotoxicity.** Columns represent percent of dead cells. Bars show average standard deviation of three independent experiments.

**Supplementary Figure S5. Reduced ATP in SNU-119 and OE-19 cell lines by NAMPT**

**inhibitors plus CA3.** Levels of ATP production via mitochondrial respiration and glycolysis in SNU-119 and OE-19 cell lines exposed to GMX1778 (10nM) and STF1188804 (20nM) plus CA3(0.5  $\mu$ M) for 24h. ATP production is measured as pmol/min/cell x 1000. ATP production is expressed as 100% in untreated cells (control). Bars represent standard deviations of three independent results.

**References for Supplementary Figures and Tables**

1. Gene set enrichment analysis: A knowledge-based approach for interpreting genome-wide expression profiles. Subramanian, A., Tamayo, P., Mootha, V. K., Mukherjee, S., Ebert, B. L., Gillette, M. A., Paulovich, A., Pomeroy, S. L., Golub, T. R., Lander, E. S. & Mesirov, J. P. Proc. Natl. Acad. Sci. USA (2005) 102:15545-50.

**Supplementary Table S1. Neuroendocrine cell lines subjected to library screen.**

|                   | <b>NCI-H69 [H69] (ATCC® HTB119™)</b> | <b>DMS 79 (ATCC® CRL2049™)</b>    | <b>NCIH727 [H727] (ATCC® CRL5815™)</b> |
|-------------------|--------------------------------------|-----------------------------------|----------------------------------------|
| Organism          | Homo sapiens                         | Homo sapiens                      | Homo sapiens                           |
| Tissue            | Lung                                 | Lung/pleural fluid                | Lung, bronchus                         |
| Disease           | Carcinoma; small cell lung cancer    | Carcinoma; small cell lung cancer | Carcinoid                              |
| Age               | 55 years                             | 65 years                          | 66 years                               |
| Gender            | Male                                 | N/A                               | Female                                 |
| Morphology        | Floating aggregates                  | Floating aggregates               | Epithelial                             |
| Growth Properties | Suspension, multicell aggregates     | Suspension, multicell aggregates  | Adherent                               |
| KRAS              | Negative                             | Negative                          | Positive (G12V, one allele)            |

**Supplementary Table S1, Safari  
et al**

**Supplementary Table S2**

| HALLMARK Name                     | Size | Matches | ES       | abs(ES)  | NES      | p      | q        |
|-----------------------------------|------|---------|----------|----------|----------|--------|----------|
| GLYCOLYSIS                        | 200  | 147     | -0.43215 | 0.432152 | -1.52533 | 0.0000 | 0.142742 |
| APOPTOSIS                         | 161  | 128     | -0.43921 | 0.439208 | -1.54374 | 0.0000 | 0.140372 |
| APICAL JUNCTION                   | 200  | 177     | -0.40186 | 0.401862 | -1.55682 | 0.0000 | 0.13301  |
| IL6 JAK STAT3 SIGNALING           | 87   | 73      | -0.56721 | 0.567205 | -1.58883 | 0.0000 | 0.125188 |
| COAGULATION                       | 138  | 118     | -0.48671 | 0.486713 | -1.62693 | 0.0000 | 0.095041 |
| TNFA SIGNALING VIA NFKB           | 200  | 178     | -0.59339 | 0.593393 | -1.62731 | 0.0000 | 0.10056  |
| ANDROGEN RESPONSE                 | 100  | 76      | -0.47517 | 0.475174 | -1.63339 | 0.0000 | 0.112286 |
| ESTROGEN RESPONSE LATE            | 200  | 180     | -0.52343 | 0.523428 | -1.67717 | 0.0000 | 0.088398 |
| P53 PATHWAY                       | 200  | 161     | -0.53431 | 0.53431  | -1.68543 | 0.0000 | 0.091975 |
| CHOLESTEROL HOMEOSTASIS           | 74   | 58      | -0.59071 | 0.590708 | -1.72817 | 0.0000 | 0.089293 |
| INFLAMMATORY RESPONSE             | 200  | 174     | -0.49973 | 0.499734 | -1.74054 | 0.0000 | 0.129532 |
| ESTROGEN RESPONSE EARLY           | 200  | 186     | -0.56064 | 0.560636 | -1.8528  | 0.0000 | 0.093508 |
| APICAL SURFACE                    | 44   | 41      | -0.42136 | 0.42136  | -1.47537 | 0.0207 | 0.154288 |
| PROTEIN SECRETION                 | 96   | 50      | -0.54142 | 0.541422 | -1.49476 | 0.0236 | 0.144821 |
| IL2 STAT5 SIGNALING               | 199  | 176     | -0.44637 | 0.44637  | -1.54013 | 0.0336 | 0.1397   |
| TGF BETA SIGNALING                | 54   | 39      | -0.65942 | 0.659417 | -1.73507 | 0.0361 | 0.09964  |
| PI3K AKT MTOR SIGNALING           | 105  | 72      | -0.39226 | 0.392261 | -1.43808 | 0.0365 | 0.1689   |
| COMPLEMENT                        | 200  | 168     | -0.4397  | 0.439695 | -1.51489 | 0.0398 | 0.141199 |
| INTERFERON ALPHA RESPONSE         | 97   | 80      | -0.65863 | 0.658631 | -1.62829 | 0.0398 | 0.104239 |
| INTERFERON GAMMA RESPONSE         | 200  | 163     | -0.58931 | 0.589307 | -1.64293 | 0.0421 | 0.122634 |
| PANCREAS BETA CELLS               | 40   | 35      | 0.597306 | 0.597306 | 1.9042   | 0.0515 | 0.072785 |
| SPERMATOGENESIS                   | 135  | 90      | 0.469632 | 0.469632 | 1.677    | 0.0524 | 0.119635 |
| UV RESPONSE DN                    | 144  | 122     | -0.35999 | 0.359993 | -1.28181 | 0.0538 | 0.251547 |
| REACTIVE OXYGEN SPECIES PATHWAY   | 49   | 36      | -0.46741 | 0.467405 | -1.39445 | 0.0622 | 0.177052 |
| ADIPOGENESIS                      | 200  | 120     | -0.4583  | 0.458299 | -1.53683 | 0.0646 | 0.14122  |
| XENOBIOTIC METABOLISM             | 200  | 161     | -0.39881 | 0.398808 | -1.47295 | 0.0690 | 0.148839 |
| HYPOXIA                           | 200  | 177     | -0.36582 | 0.365815 | -1.37976 | 0.0722 | 0.183553 |
| HEME METABOLISM                   | 200  | 143     | -0.35937 | 0.359365 | -1.31541 | 0.0759 | 0.221813 |
| BILE ACID METABOLISM              | 112  | 93      | -0.36758 | 0.367584 | -1.39738 | 0.0792 | 0.179413 |
| FATTY ACID METABOLISM             | 158  | 105     | -0.38542 | 0.385423 | -1.3223  | 0.0861 | 0.226026 |
| E2F TARGETS                       | 200  | 96      | 0.57725  | 0.57725  | 1.56721  | 0.0915 | 0.127444 |
| OXIDATIVE PHOSPHORYLATION         | 200  | 73      | -0.47192 | 0.471921 | -1.40128 | 0.0996 | 0.184078 |
| HEDGEHOG SIGNALING                | 36   | 34      | 0.476058 | 0.476058 | 1.53039  | 0.1005 | 0.119426 |
| G2M CHECKPOINT                    | 200  | 95      | 0.543436 | 0.543436 | 1.47765  | 0.1029 | 0.129089 |
| ALLOGRAFT REJECTION               | 200  | 153     | -0.37956 | 0.379556 | -1.42843 | 0.1204 | 0.169021 |
| NOTCH SIGNALING                   | 32   | 25      | -0.46752 | 0.467518 | -1.32748 | 0.1217 | 0.22616  |
| WNT BETA CATENIN SIGNALING        | 42   | 33      | 0.335298 | 0.335298 | 1.27756  | 0.1355 | 0.309127 |
| ANGIOGENESIS                      | 36   | 32      | -0.41284 | 0.41284  | -1.27191 | 0.1883 | 0.253411 |
| UV RESPONSE UP                    | 158  | 112     | -0.31816 | 0.318164 | -1.14175 | 0.2171 | 0.371803 |
| PEROXISOME                        | 104  | 73      | -0.3237  | 0.323696 | -1.11668 | 0.2350 | 0.373419 |
| UNFOLDED PROTEIN RESPONSE         | 113  | 57      | -0.30433 | 0.304332 | -1.05944 | 0.2865 | 0.427046 |
| MTORC1 SIGNALING                  | 200  | 126     | -0.37347 | 0.373474 | -1.12176 | 0.2986 | 0.378496 |
| MYOGENESIS                        | 200  | 174     | -0.27313 | 0.273127 | -1.03024 | 0.3630 | 0.442651 |
| EPITHELIAL MESENCHYMAL TRANSITION | 200  | 192     | -0.31124 | 0.311236 | -1.04132 | 0.3893 | 0.435515 |
| KRAS SIGNALING UP                 | 200  | 179     | -0.25833 | 0.258329 | -1.00109 | 0.4435 | 0.465614 |
| MYC TARGETS V2                    | 58   | 27      | 0.422129 | 0.422129 | 0.958635 | 0.5633 | 0.711597 |
| MYC TARGETS V1                    | 200  | 57      | 0.331726 | 0.331726 | 0.875717 | 0.5869 | 0.678723 |
| MITOTIC SPINDLE                   | 199  | 123     | 0.253314 | 0.253314 | 0.926956 | 0.7265 | 0.680791 |
| KRAS SIGNALING DN                 | 200  | 173     | 0.200766 | 0.200766 | 0.842843 | 0.7454 | 0.650799 |
| DNA REPAIR                        | 150  | 61      | -0.20602 | 0.206023 | -0.67157 | 0.9427 | 0.874454 |

**Supplementary Table S2, Safari et al**

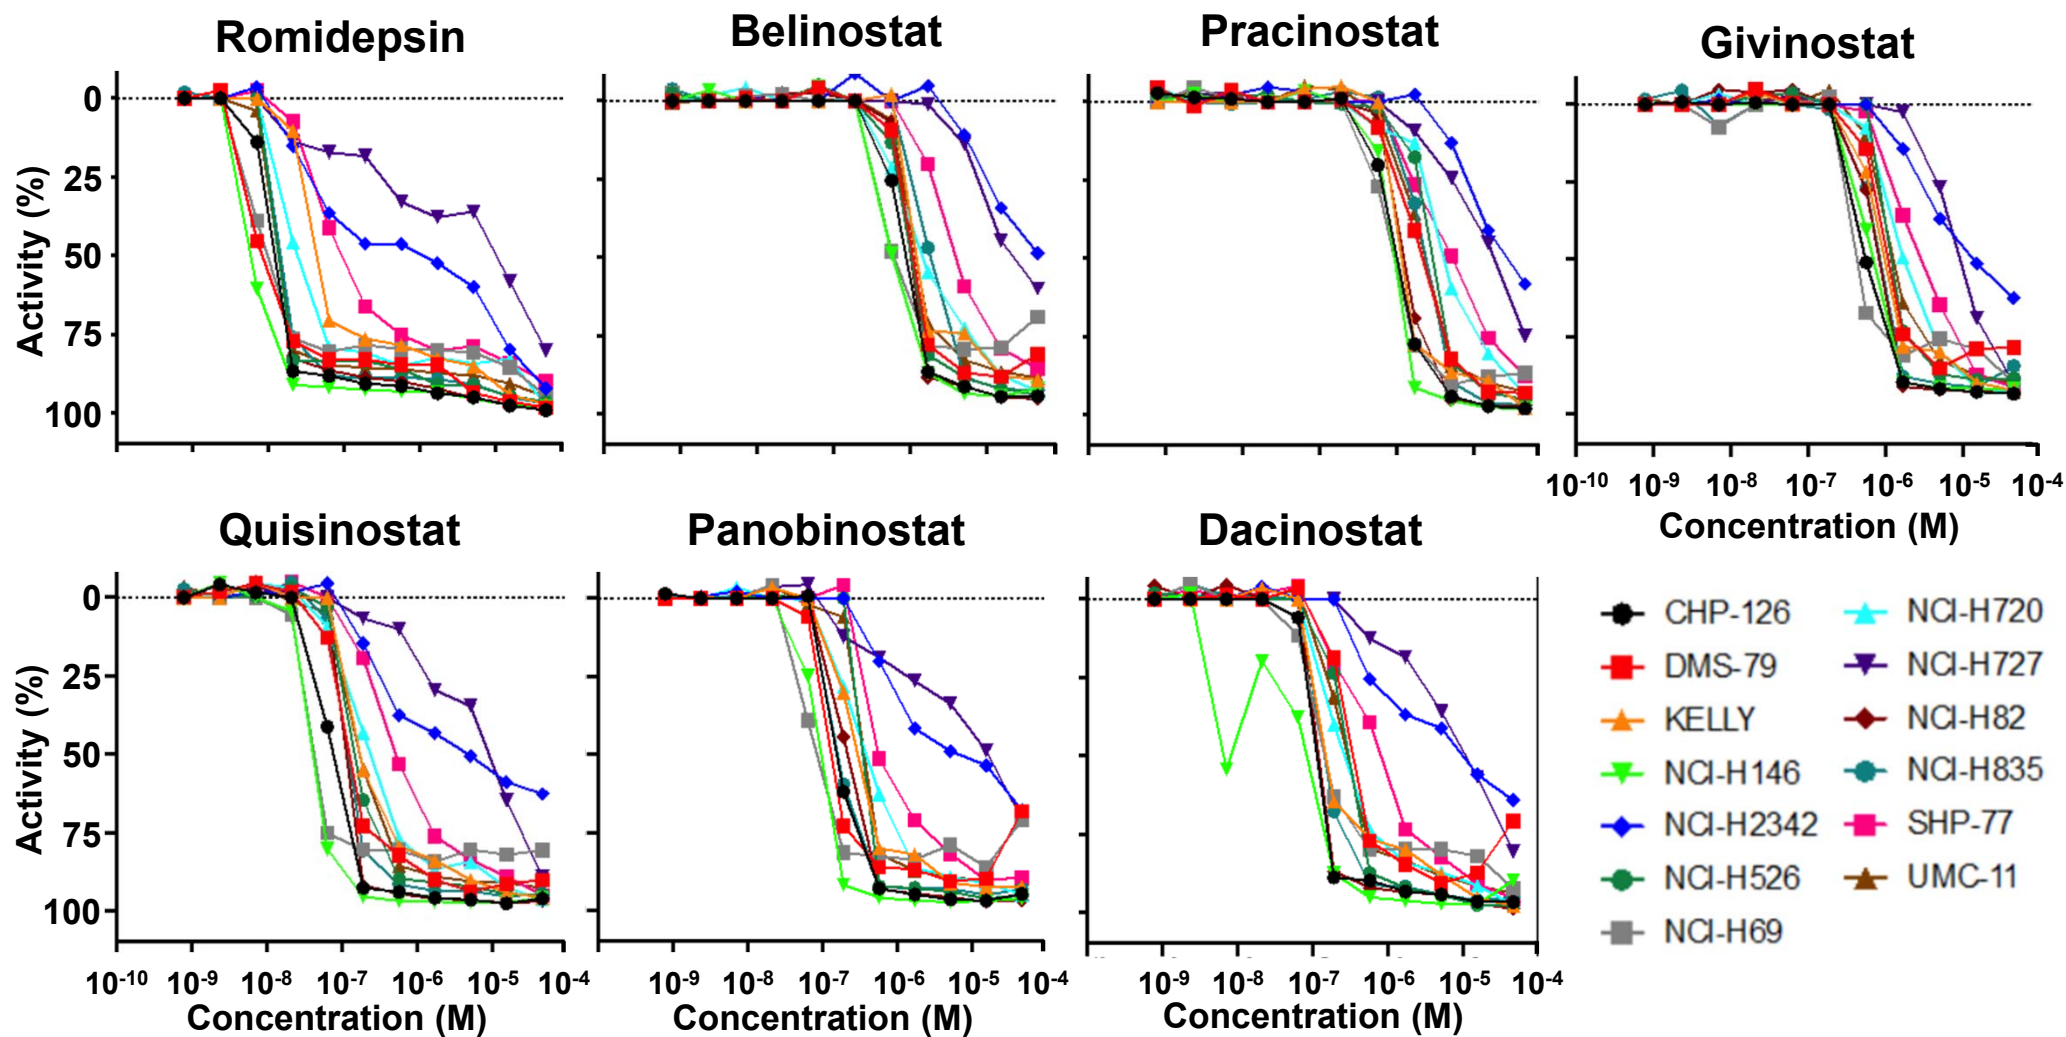

Supplementary Figure S1, Safari et al

A

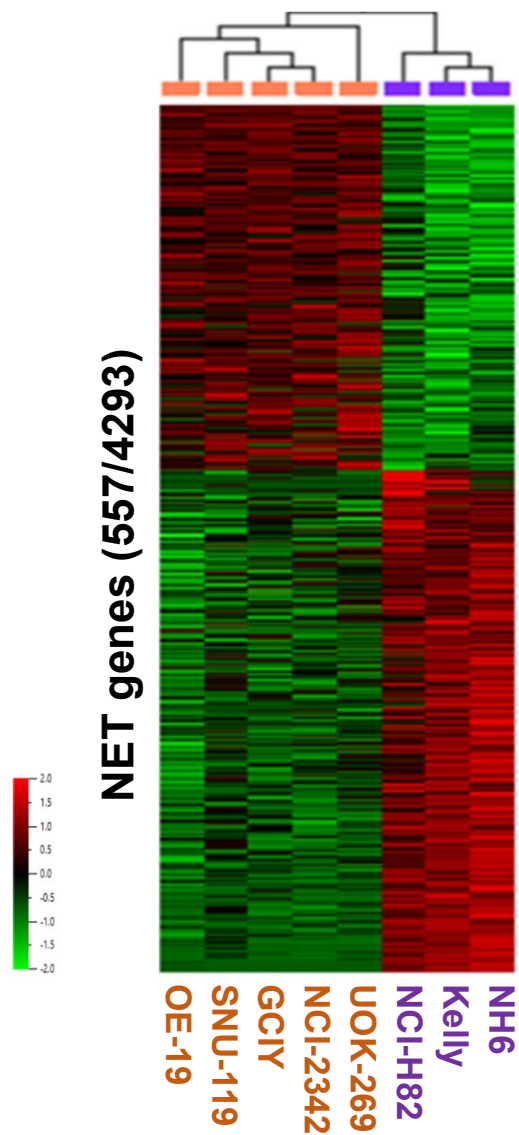

Differentially  
expressed  
genes = 2696  
(2139 + 557)

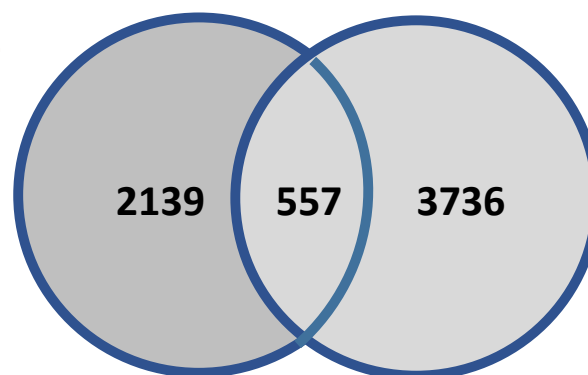

NET annotated  
genes = 4293  
(3736 + 557)

Supplementary Figure S2A, Safari  
et al

**B**

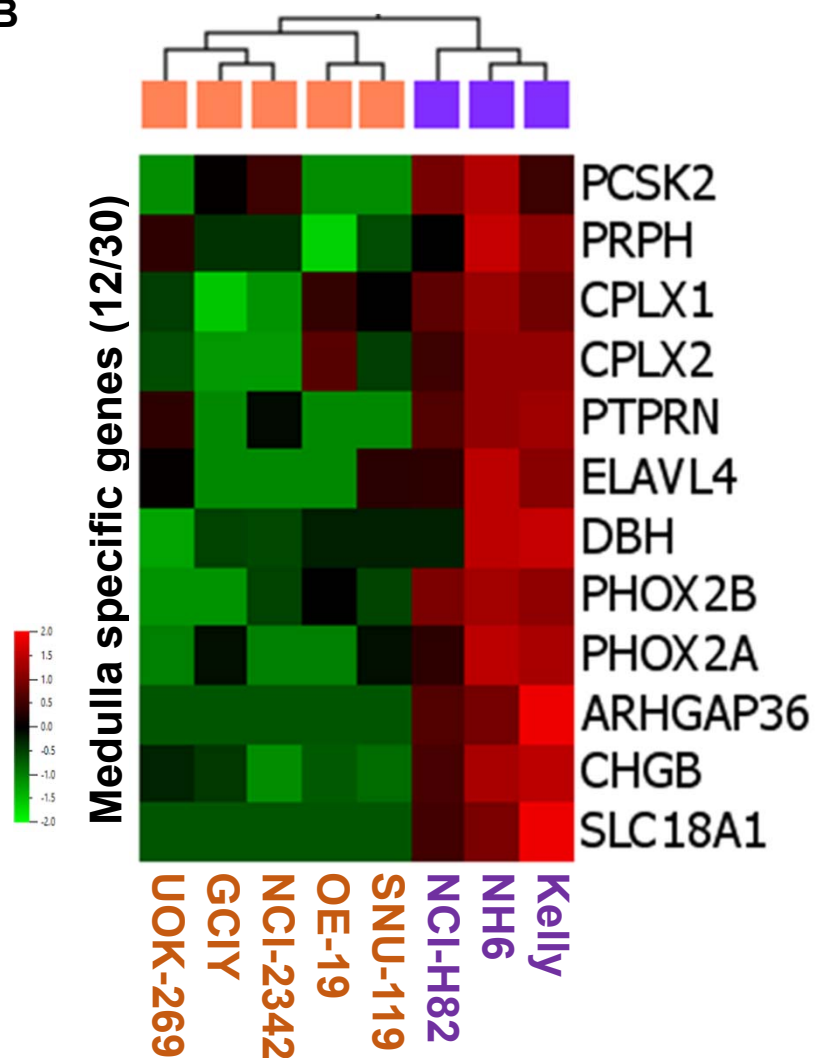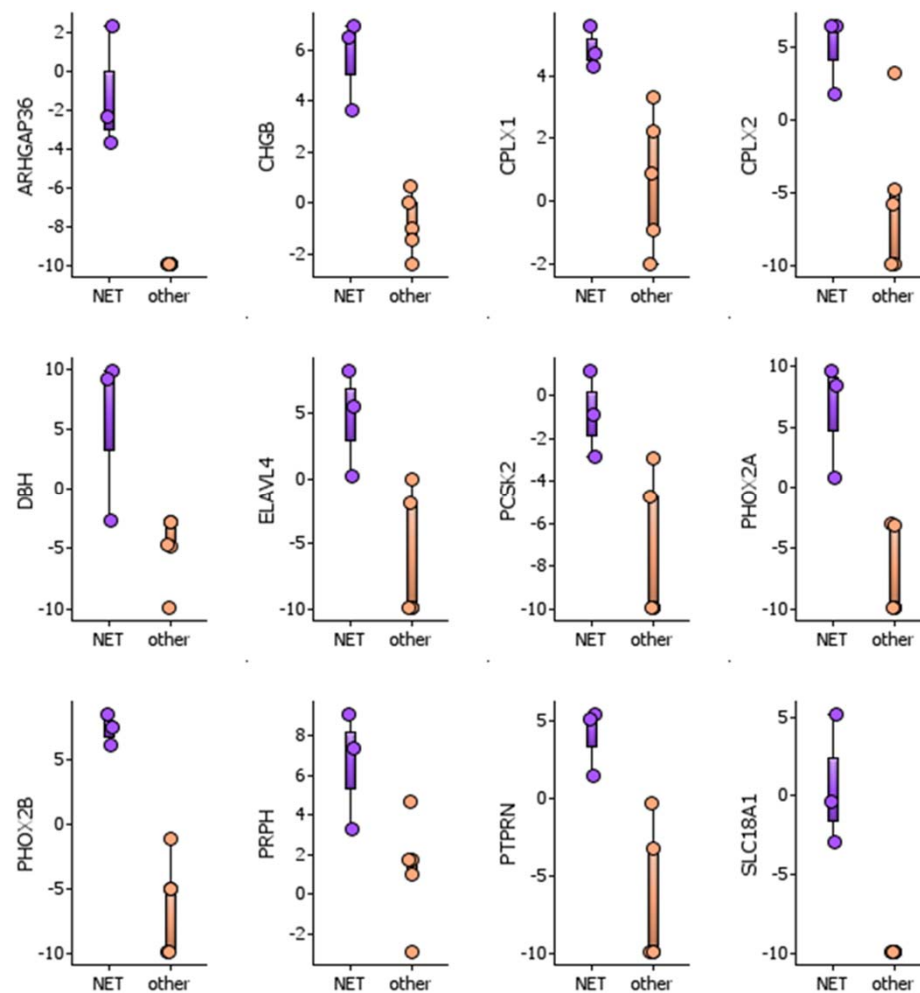

Supplementary Figure S2B, Safari et al

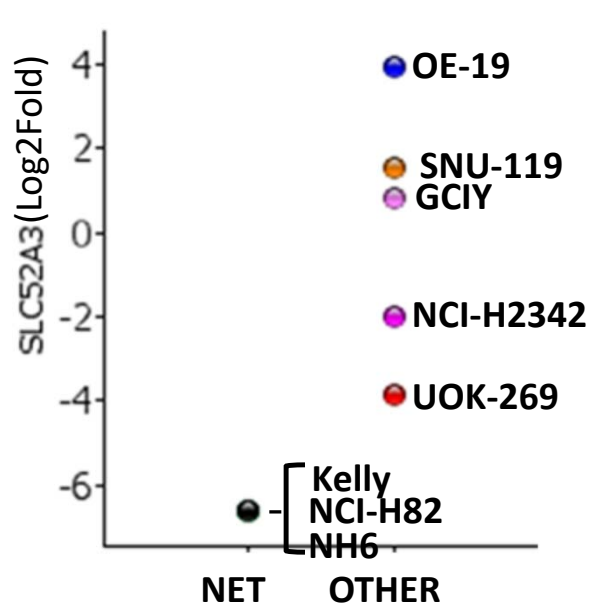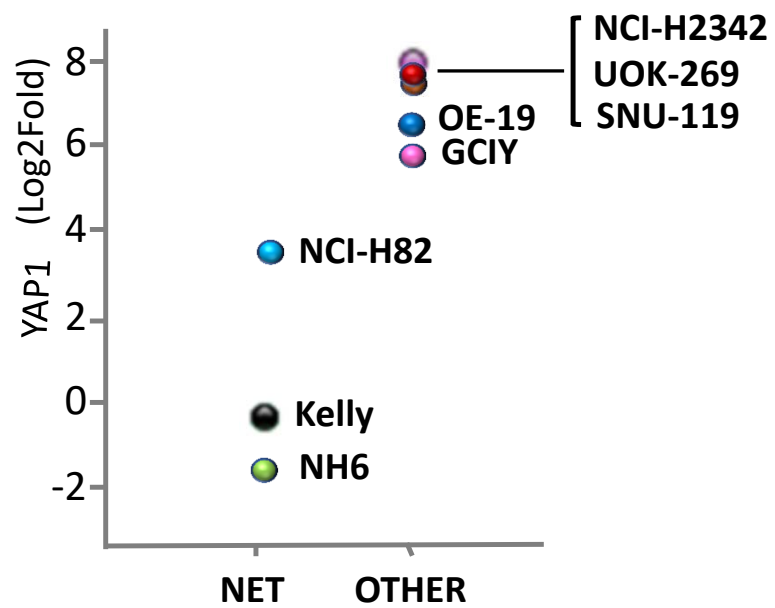

Supplementary Figure S3, Safari et al



**A**

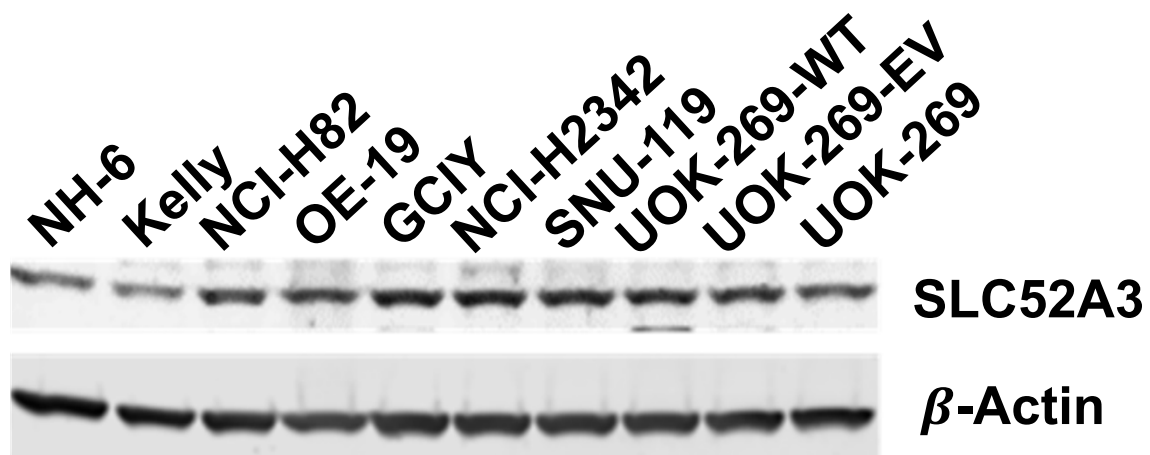

**B**

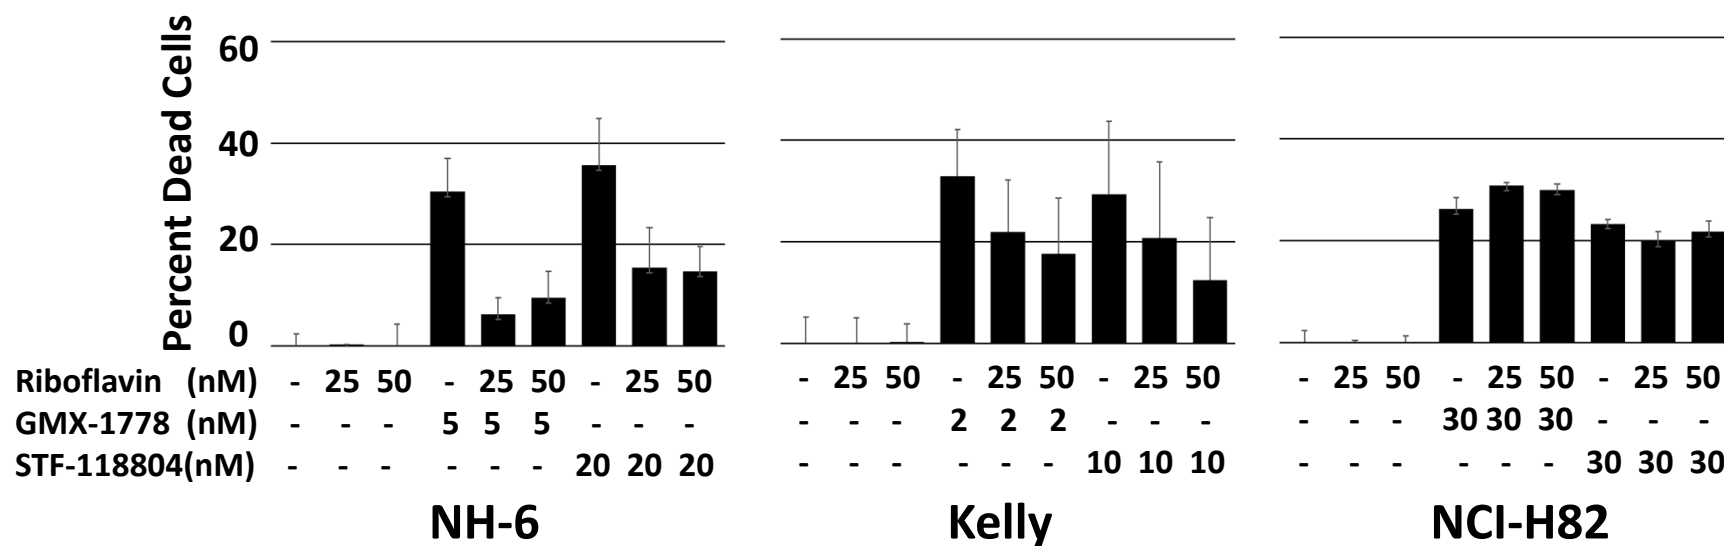

Supplementary Figure S4, Safari et al

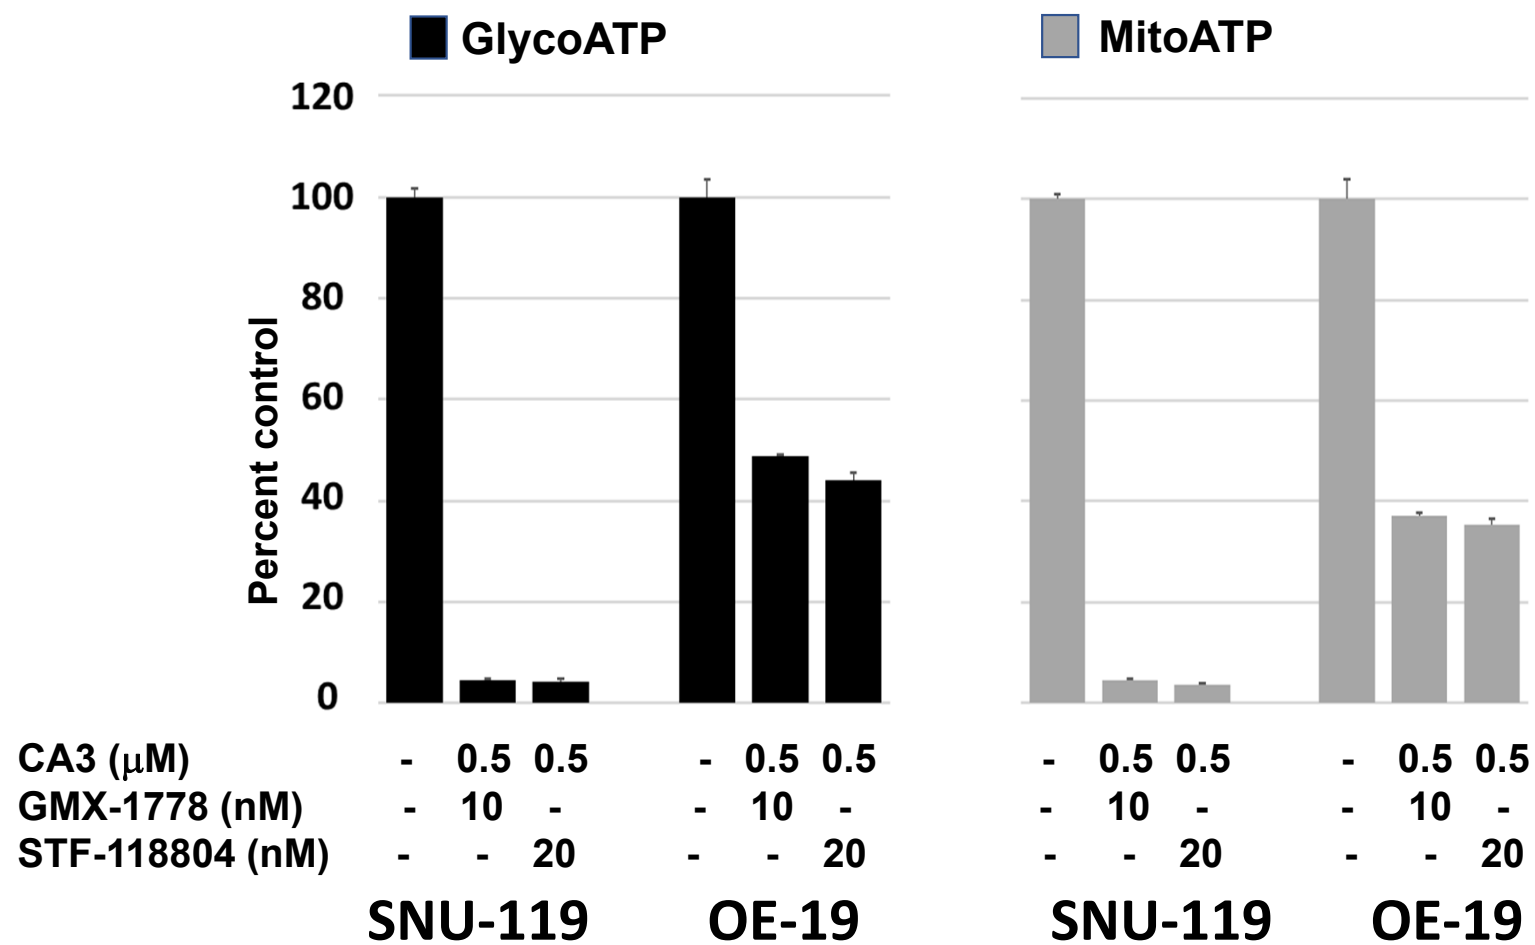

Supplementary Figure S5. Safari et al

## High-throughput screening

For small molecule library screening, cells were suspended in appropriate cell culture medium (supplemented with 10% FBS, 100-units/L penicillin-streptomycin and 1% glutamine), and then dispensed to white solid bottom 1536-well tissue culture plates (Greiner Bio-one) at a density of 1,000 cells in 5  $\mu$ L of media (MultiDrop Combi, Thermofisher Scientific, MA). After incubating at 37°C, 5% CO<sub>2</sub> overnight, 20 nL of DMSO-solubilized compounds from compound plates were transferred (Wako Automation, San Diego, CA) to the cell assay plate from column 5 to column 48. The controls were added in columns 1 to 4 of each assay plate. Columns 1 and 2 were DMSO control. After 48 hours of incubation, 3  $\mu$ L of Cell-TiterGlo reagent (Promega, WI) was added to each well. Following a 10 min incubation, relative luminescence units (RLU) was read in the Viewlux microplate reader (PerkinElmer, MA).

Analysis of compound concentration–response data was performed as previously described [13]. Concentration–response titration points for each compound were fitted to a four-parameter Hill equation [1] yielding concentrations of half-maximal activity (IC<sub>50</sub>) and maximal response (efficacy) values. Compounds were designated as Class 1–4 according to the type of concentration–response curve observed [2, 3]. Curve classes are heuristic measures of data confidence, classifying concentration–responses based on efficacy, the number of data points observed above background activity, and the quality of fit. Compounds with curve classes 1.1, 1.2, 2.1, 2.2 were considered active. Class 4 compounds were considered inactive. Compounds with other curve classes were deemed inconclusive. Active compounds were cherry-picked for follow up experiments.

### **Clustering of compounds by activity outcomes.**

Compounds were clustered hierarchically using TIBCO Spotfire 6.0.0 (Tibco Software Inc., Cambridge, MA. <https://spotfire.tibco.com/>) based on their activity outcomes from the primary or follow up screens across different methyltransferases. Compound's AUC (Area Under the Curve) calculated based on the qHTS data analysis and curve fittings were utilized for clustering. In the heatmap, darker red indicates compounds that are more potent and efficacious, i.e., high-quality actives, and lighter red indicates less potent and efficacious compounds. If a compound didn't show any activity in an assay, it was highlighted as white in the heatmap.

### **Evaluation of riboflavin protective role on cell viability.**

Kelly, NH6 and NCI-H82 cells were cultured in growth medium supplemented with 10% inactivated fetal bovine serum. For the analysis of the protective role of riboflavin versus cytotoxicity, riboflavin was added at a final concentration of 25 and 50nM in absence or presence of GMX1778 (10nM) and STF11804 (20nM). After 48h culture, cells were harvested, and the viability was determined by using the annexin V fluorescein isothiocyanate (annexin V-FITC) Apoptosis Detection Kit (BD Biosciences, San Diego, CA) according to the manufacturer's instructions. Following treatment, annexin positive cells were quantitated by FACS analysis (Becton Dickinson, Ranklin Lakes, NJ) using FCS Express Cytometry Software (Tree Star, Inc, Ashland, OR). The percentage of annexin positive was calculated and the delta between treated and untreated control was determined.

- 1 HILL A. The possible effects of the aggregation of the molecules of haemoglobin on its dissociation curves. *J Physiol* 1910; 14: iv-vii.
- 2 Inglese J, Auld DS, Jadhav A, Johnson RL, Simeonov A, Yasgar A *et al.* Quantitative high-throughput screening: a titration-based approach that efficiently identifies biological activities in large chemical libraries. *Proc Natl Acad Sci U S A* 2006; 103: 11473-11478.
- 3 Huang RL, Xia MH, Cho MH, Sakamuru S, Shinn P, Houck KA *et al.* Chemical Genomics Profiling of Environmental Chemical Modulation of Human Nuclear Receptors. *Environ Health Persp* 2011; 119: 1142-1148.
